# Supplementary material
Source: PubMed Central journal article supplement (PMC2766237)

analysis 96 hours post-transfection. C: Effects of IGF-1R knockdown by siRNA on PPP sensitivity in U-2OS<sub>MR</sub> cells.

**Supplementary Figure S1.** Effect of sublethal concentration (0.005 $\mu$ M) of PPP on paclitaxel-induced cell death in U-2OS and U-2OS<sub>MR</sub> cells determined by MTT assay as described in “Materials and Methods”.

**Supplementary Figure S2.** PPP induces apoptosis in osteosarcoma cells. U-2OS<sub>MR</sub> cells were treated with PPP in various concentrations as indicated. Total cellular proteins were subjected to immunoblotting with specific antibodies to PARP and  $\beta$ -actin as described in “Materials and Methods”.

A

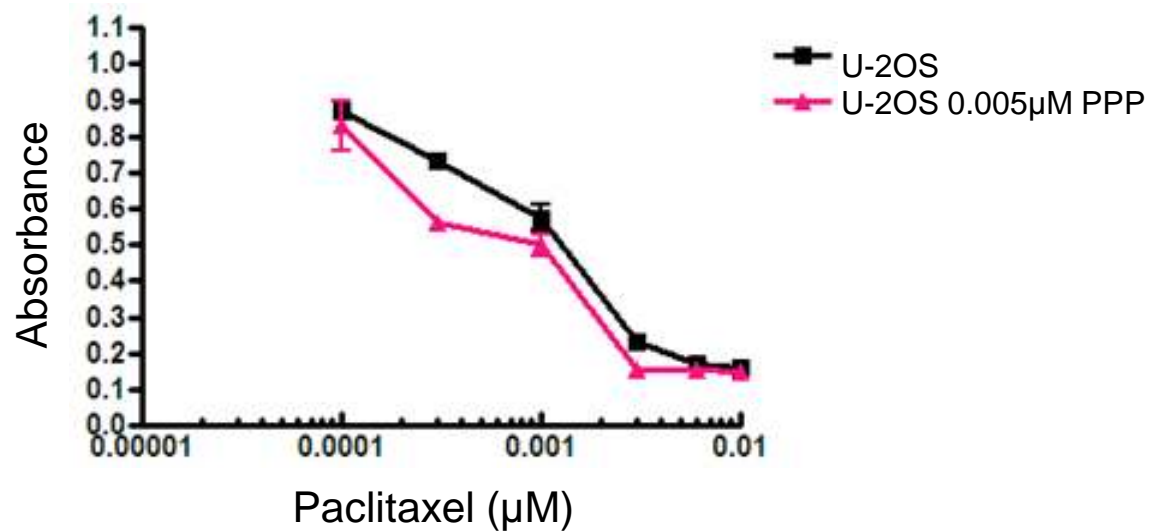

B

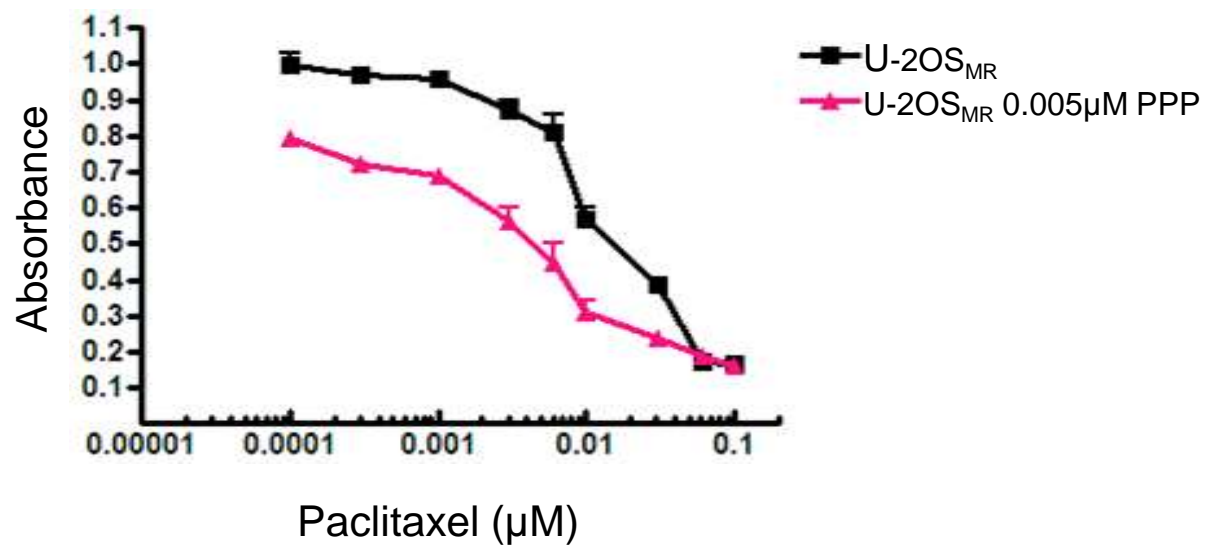

Supp. Fig. S2

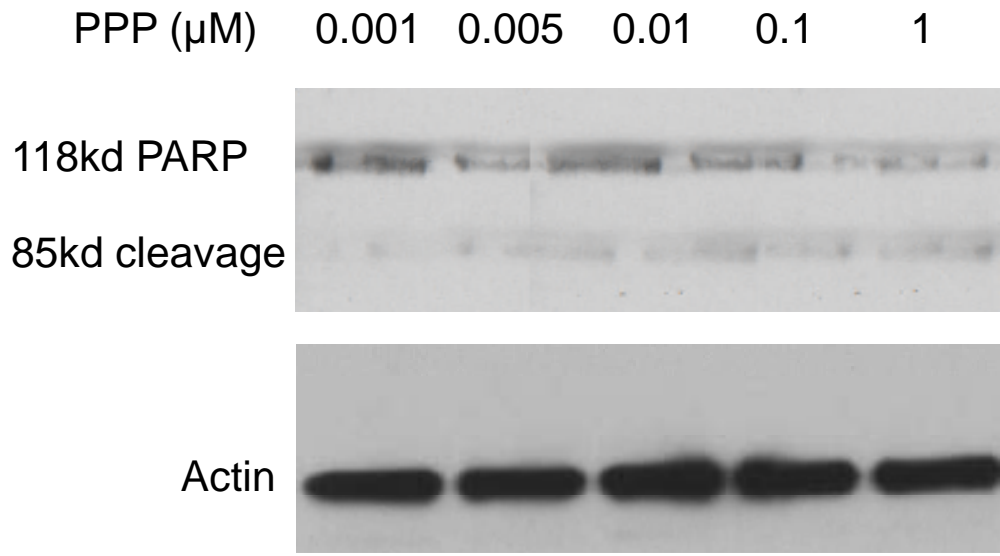

Supplement: NIHMS125962-supplement-supplement_1.pdf [file NIHMS125962-supplement-supplement_1.pdf]
